# Supplementary material for: Patient-reported outcomes of adverse events after perioperative chemotherapy for breast cancer: A prospective observational study
Source: Research Square preprint supplement (doi:10.21203/rs.3.rs-7811470/v1), 2025-10-15
Supplement: Supplementary file 1 [file 8fd8f67d4e3bbd01f643d6b7.docx]

**Supplementary Table S1.** The incidence of adverse events of TC and A+T groups by grade.

|  | TC (n=22) | | A + T (n=93) | |
| --- | --- | --- | --- | --- |
| Adverse Events, (n) | End of CT | After 6 months | End of CT | After 6 months |
| Nausea |  |  |  |  |
| grade 1 | 4 (18.2%) | 4 (18.2%) | 21 (22.6%) | 10 (10.8%) |
| grade 2 | 6 (27.3%) | 2 (9.1%) | 13 (14.0%) | 4 (4.3%) |
| grade 3 | 0 | 0 | 0 | 0 |
| Vomiting |  |  |  |  |
| grade 1 | 3 (13.6%) | 1 (4.5%) | 5 (5.4%) | 1 (1.1%) |
| grade 2 | 0 | 0 | 0 | 0 |
| grade 3 | 0 | 0 | 0 | 0 |
| Mucositis oral |  |  |  |  |
| grade 1 | 3 (13.6%) | 5 (22.7%) | 29 (31.2%) | 12 (12.9%) |
| grade 2 | 0 | 0 | 5 (5.4%) | 4 (4.3%) |
| grade 3 | 1 (4.5%) | 0 | 8 (8.6%) | 1 (1.1%) |
| Constipation |  |  |  |  |
| grade 1 | 6 (27.2%) | 6 (27.2%) | 25 (28.0%) | 18 (19.4%) |
| grade 2 | 6 (27.2%) | 5 (22.7%) | 21 (22.6%) | 16 (17.2%) |
| grade 3 | 0 | 0 | 3 (3.2%) | 2 (2.2%) |
| Diarrhea |  |  |  |  |
| grade 1 | 5 (22.7%) | 4 (18.2%) | 28 (30.1%) | 16 (17.2%) |
| grade 2 | 1 (4.5%) | 0 | 5 (5.4%) | 3 (2.6%) |
| grade 3 | 1 (4.5%) | 0 | 1 (0.9%) | 1 (0.9%) |
| Dysgeusia |  |  |  |  |
| grade 1 | 3 (13.6%) | 7 (31.8%) | 38 (40.9%) | 29 (25.0%) |
| grade 2 | 9 (40.9%) | 2 (9.1%) | 32 (34.4%) | 14 (12.1%) |
| grade 3 | 0 | 0 | 0 | 0 |
| Insomnia |  |  |  |  |
| grade 1 | 3 (13.6%) | 2 (9.1%) | 23 (24.7%) | 21 (22.6%) |
| grade 2 | 5 (22.7%) | 4 (18.2%) | 26 (28.0%) | 16 (17.2%) |
| grade 3 | 2 (9.1%) | 0 | 7 (7.5%) | 9 (9.7%) |
| Peripheral sensory neuropathy |  |  |  |  |
| grade 1 | 10 (45.5%) | 7 (31.8%) | 43 (46.2%) | 46 (49.5%) |
| grade 2 | 2 (9.1%) | 1 (4.5%) | 17 (18.3%) | 12 (12.9%) |
| grade 3 | 1 (4.5%) | 0 | 13 (14.0%) | 8 (8.6%) |
| Nail loss |  |  |  |  |
| grade 1 | 4 (18.2%) | 5 (22.7%) | 22 (23.7%) | 44 (47.3%) |
| grade 2 | 1 (4.5%) | 2 (9.1%) | 8 (8.6%) | 8 (8.6%) |
| grade 3 | 0 | 0 | 0 | 0 |

CT; chemotherapy, TC; docetaxel/cyclophosphamide, A; anthracycline based chemotherapy, T; taxane based chemotherapy regimen.
